# Supplementary material
Source: PubMed Central journal article supplement (PMC5068286)
Supplement: pnas.1611594113.sapp.pdf [file pnas.1611594113.sapp.pdf]

## Supplementary Material & Methods

### Bacterial Strains and Growth

All strains and plasmids used in this study are listed in Table S8. All *A. baumannii*, *E. coli*, and *S. aureus* strains were grown from freezer stocks initially on Luria-Bertani (LB) agar at 37° C. For selection, 100 µg/ml of ampicillin, 7.5 µg/ml of kanamycin, or 10 µg/ml of colistin were used when appropriate. Strains that harbored the pABBRKn or pMMB67Kn plasmid for complementation or overexpression were grown in 30 µg/ml of kanamycin.

### Construction of mutant and complementation *A. baumannii* strains

Primers used in this study are listed in Table S9. All *A. baumannii* mutations were isolated as previously described (1). Briefly, *A. baumannii* ATCC 17978 pMMB67EH carrying the REC<sub>Ab</sub> coding sequences (pAT04) were inoculated from an overnight culture at OD<sub>600</sub> = 0.05 and grown for 45 m. Expression of REC<sub>Ab</sub> (pAT03) was induced by addition of 2 mM IPTG and cells were grown at 37° C until they reached mid-exponential growth phase (OD<sub>600</sub> = 0.4). Cells were washed in 10% glycerol and 10<sup>10</sup> cells were electroporated in a 2 mM cuvette at 1.8 mV with 5 µg of a recombineering linear PCR product. For recovery, cells were grown for 4 h in 4 ml of LB broth with 2mM IPTG. Cells were collected via centrifugation and plated. PCR and Sanger sequencing verified all genetic mutations.

Removal of the pMMB67EH::REC<sub>Ab</sub> Tet<sup>R</sup> plasmid following isolation of mutants was performed as previously described (2). pMMB67EH carrying the FLP recombinase was electroporated into cured mutants. Cells were recovered for 1h in 4 ml of LB and plated on agar containing 2 mM IPTG to induce expression of the FLP recombinase. PCR and Sanger sequencing confirmed excision of the kanamycin cassette. To complement *A. baumannii* mutants, the coding sequence from *ponA* encoding PBP1A (ATCC 17978), *lpxC* encoding LpxC (ATCC 19606), and *lpxA* encoding LpxA (ATCC 17978) were cloned into the XhoI and KpnI sites in pABBRKn. These plasmids were transformed into the respective mutant for complementation. To overexpress *A. baumannii* lipoproteins, the coding sequence from *HMPREF0010\_01944*, *HMPREF0010\_01945*, and *HMPREF0010\_02739*, were cloned into the KpnI and Sall sites in pMMB67EHKn. The IPTG-inducible constructs were transformed into wild type ATCC 19606 *A. baumannii* and grown in 0.5 mM IPTG to induce lipoprotein expression.

### Isolation of LOS-deficient *A. baumannii* and determination of mutation frequency

To isolate LOS-deficient colonies, an OD<sub>600</sub> of 1.0 (~10<sup>9</sup> CFU) of *A. baumannii* was plated on LB agar containing 10 µg/ml of colistin. Isolated colonies were picked and replica plated on LB vancomycin (10 µg/ml) and LB colistin (10 µg/ml). Colonies sensitive to vancomycin, but resistant to colistin were deemed LOS-deficient. We made this assertion after a pilot experiment where we examined ten isolates from three distinct *A. baumannii* strains. We stained each for the presence or absence of LOS using the ProQ Emerald 300 Lipopolysaccharide gel stain (Thermo Fisher Scientific). All colonies (100%) were defective in LOS biosynthesis so we designated these selective parameters as indicative of the absence of LOS.

To determine the frequency of lipid A inactivation (LOS-deficiency) in the various *A. baumannii* strains, OD<sub>600</sub> of 1.0 (~10<sup>9</sup> CFU) of each strain was plated on LB agar containing 10 µg/ml of colistin in triplicate. Colonies were replica plated on LB vancomycin (10 µg/ml) and LB colistin (10 µg/ml). Variants sensitive to vancomycin, but resistant to colistin were defined as lacking lipid A (LOS-deficient). The mutation rate was calculated for three biological replicates and one representative set was reported.

#### **Isolation of Lipid A, Phospholipids, and LOS staining**

Isolation of *A. baumannii* lipid A for TLC analysis involved <sup>32</sup>P-radiolabelling of whole cells as previously described (2, 3). Lipid A extraction was carried out by mild-acid hydrolysis as previously described (4), while phospholipids were isolated using Bligh/Dyer extractions (5). Radiolabelled lipids were used for TLC, while unlabeled lipids were used for MS analysis.

For LOS staining whole cells were grown to OD<sub>600</sub> of 1.0 (~10<sup>9</sup> CFU) and then 1 ml was collected washed and suspended in 1X loading buffer. The cells were treated with proteinase K followed by separation using SDS-PAGE. Staining was performed using the ProQ Emerald 300 Lipopolysaccharide gel stain (Thermo Fisher Scientific) as described by the manufacture to visualize LOS.

#### **Mass Spectrometry**

Lipid A was analyzed using a MALDI-TOF (ABI 4700 Proteomics Analyzer) mass spectrometer in the positive or negative mode as previously described (2, 3).

Phospholipids analysis was performed using normal phase LC on an Agilent 1200 Quaternary LC system equipped with an Ascentis Silica HPLC column, 5 mm, 25 cm x 2.1 mm (Sigma-Aldrich, St. Louis, MO). Mobile phase A consisted of chloroform/methanol/aqueous ammonium hydroxide (800:195:5, v/v); mobile phase B consisted of chloroform/methanol/water/aqueous ammonium hydroxide (600:340:50:5, v/v); mobile phase C

consisted of chloroform/methanol/water/aqueous ammonium hydroxide (450:450:95:5, v/v). The elution program consisted of the following: 100% mobile phase A was held isocratically for 2 min and then linearly increased to 100% mobile phase B over 14 min and held at 100% B for 11 min. The LC gradient was then changed to 100% mobile phase C over 3 min and held at 100% C for 3 min, and finally returned to 100% A over 0.5 min and held at 100% A for 5 min. The LC eluent (with a total flow rate of 300 ml/min) was introduced into the ESI source of a high resolution TripleTOF5600 mass spectrometer (Sciex, Framingham, MA). Instrumental settings for negative ion ESI and MS/MS analysis of lipid species were as follows: IS= -4500 V; CUR= 20 psi; GSI= 20 psi; DP= -55 V; and FP= -150 V. The MS/MS analysis used nitrogen as the collision gas. Data analysis was performed using Analyst TF1.5 software (Sciex, Framingham, MA).

### **TLR-4 Signaling Assays**

The HEK-Blue human TLR4 (hTLR-4), cell line was maintained according to the manufacturer specifications (InvivoGen). Bacterial strains were serially diluted for assays and used as previously described (6). Two biological replicates were done in triplicate and one representative set was reported.

### **Nucleic Acid Extraction**

Total RNA was extracted using the Direct-Zol RNA MiniPrep Kit (Zymo Research) from *A. baumannii* grown to a final OD<sub>600</sub> of 0.6. Isolated RNA was treated with DNA-free DNA removal kit (Thermo-Fisher Scientific) to eliminate genomic DNA contamination. DNase-depleted RNA was used for qRT-PCR and RNA-seq.

Chromosomal DNA was extracted using the Easy-DNA gDNA Purification kit (Thermo Fisher Scientific) from cultures grown to a final OD<sub>600</sub> of 0.6. Isolated DNA was sonicated to an average DNA fragment size of ~300bp with a spread of 50-800bp.

### **Quantitative RT-PCR**

Relative-abundance quantitative PCR (qPCR) was performed as previously described (7). In brief, the Sybr Fast One-Step qRT-PCR kit (Kapa Biosystems) was used with 16S rDNA as the internal reference. For gene expression analysis, relative expression reverse-transcription quantitative PCR was performed with Applied Systems RNA-Ct one-step system. Relative expression levels were calculated using the  $\Delta\Delta C_t$  method (8), with normalization of gene targets to 16S rDNA signals.

### **RNA-sequencing**

RNA-sequencing was performed as previously described (9). Briefly, DNA-depleted RNA was processed for Illumina sequencing using the NEB Next Ultra Directional RNA Library Prep kit for Illumina as described by the manufacturer (NEB). Sequencing was performed using Illumina HiSeq. Sequencing data was aligned to the respective *A. baumannii* published genome annotations using CLC genomic workbench software (Qiagen) and RPKM expression values were determined. The weighted proportions fold change of expression values between samples was determined and a Baggerley's test on proportions was used to generate a false discovery rate adjusted P-value. We then used a cut-off of 3-fold weighted proportions absolute change with a false-discovery rate adjusted P-value of  $\leq 0.05$  to identify significantly differentially regulated genes between samples. Differentially regulated pathway analysis was performed using a hypergeometric test on annotations from the KEGG pathway database and with manual annotation of the putative lipoproteins. All significantly altered pathways had a cut-off of P-value  $\leq 0.05$ . Venn diagrams were constructed using the website <http://bioinformatics.psb.ugent.be/webtools/Venn/>.

### **Genomic-sequencing**

Genomic sequences were processed for Illumina sequencing using the NEB Next Ultra DNA Library Prep kit as described by the manufacturer (NEB). Sequencing was performed using Illumina HiSeq. Reads were aligned to the respective *A. baumannii* published genome annotations using CLC genomic workbench software (Qiagen) using 90% length fraction and 90% similarities parameters. Mapped reads were locally realigned and fixed ploidy detection identified low and high frequency variants. *A. baumannii* wild type and LOS-deficient variant tracks were compared to identify mutations. Mutations in the LOS-deficient strain not present in the parent strain were called if 85% of aligned reads contained the variant. Of note, our *Ab* AYE strain did not have any reads map to plasmid NC\_010404, suggesting that it may have lost the plasmid.

### **Generation of PBP1A and NADH-specific polyclonal antibody**

PBP1A and NADH dehydrogenase chain L-specific polyclonal antibody was generated (Thermo Fisher Scientific). Briefly, a seventeen amino acid peptide from PBP1A (RIEDAYGKVIYEAKPEY) and an eighteen amino acid peptide from NADH dehydrogenase chain L (KGGNSFTSSRQTGSLREY) predicted to be solvent-exposed was selected from the primary sequence of ATCC 17978 *A. baumannii* and used to generate each specific antibody from rabbits.

### **Whole cell labeling with Sulfo-NHS-LC-LC-Biotin**

Labeling of intact whole cells or lysates with EZ-link Sulfo-NHS-LC-LC-Biotin (Thermo Fisher Scientific) was performed as previously described with slight modifications (5, 10). Briefly, *E. coli* and *A. baumannii* were grown to OD<sub>600</sub> of 0.6 and intact whole cells or lysates were labeled with 0.2mM final concentration of Sulfo-NHS-LC-LC-Biotin in 1ml of phosphate buffered saline. After 90 s Tris HCl (pH 7.5) was added to a final concentration of 250 mM to quench the reaction. Whole cells were washed after labeling, resuspended in 1X loading buffer, boiled for 5 min, and proteins were separated on SDS-PAGE and transferred to nitrocellulose for Western blotting. For fractionations, cells were lysed either before or after labeling using a needle tip sonicator (Qsonica) by pulsing for 3 X 30 s at 60% power on ice. Unlysed cells were removed by centrifugation at 10,000 X g for 10 min. The soluble and membrane fractions were separated by ultracentrifugation at 160,000 X g for 1h. Isolated fractions were loaded at equal protein concentrations and total proteins were separated using SDS-PAGE. Proteins were then transferred to nitrocellulose and subjected to Western blotting.

### **Western blotting**

Western blot analysis was carried out via gel transfer to nitrocellulose with a 0.45 µm pore size (Thermo Fisher Scientific). All blots were blocked in 5% milk for 2 h. Antibodies were diluted in 5% milk and were used at specific concentrations. Streptavidin-HRP (Thermo Scientific) was used at 1:7500 overnight. The primary antibodies α-PBP1A and α-NADH chain L were used at 1:2000 and 1:500, respectively followed by secondary an α rabbit antibody at 1:10,000 (GE). Amersham ECL Prime Western Blotting Detection Reagent (GE) was used to measure relative protein concentrations.

### **Determination of MICs**

Minimal inhibitory concentrations (MICs) were determined using E-strips (Biomérieux). Briefly, *A. baumannii* strains were spread on plates before a sterile E-strip was added to the plate. Inoculated plates were incubated overnight at 37° and MICs were assigned as the concentration where bacterial growth was inhibited.

### **Peptidoglycan analysis**

*A. baumannii* strains were grown to a final OD<sub>600</sub> of 0.6. Cells were collected and suspended in 6 mL chilled PBS and lysed by drop wise addition to 6 mL boiling 8% SDS. PG was prepared from cell lysate as previously described (11). Briefly, muropeptides were released from PG by the muramidase Cellosyl (Hoechst, Frankfurt am Main, Germany), reduced by sodium borohydride, and separated on a 250 × 4.6 mm 3 µm ProntoSIL 120-3-

C18 AQ reversed phase column (Bischoff, Leonberg, Germany). The eluted mucopeptides were detected by their absorbance at 205 nm.

## References

1. Tucker AT, et al. (2014) Defining gene-phenotype relationships in *Acinetobacter baumannii* through one-step chromosomal gene inactivation. *MBio* 5(4):e01313–01314.
2. Boll JM, et al. (2015) Reinforcing Lipid A Acylation on the Cell Surface of *Acinetobacter baumannii* Promotes Cationic Antimicrobial Peptide Resistance and Desiccation Survival. *MBio* 6(3):e00478–00415.
3. Hankins JV, et al. (2011) Elucidation of a novel *Vibrio cholerae* lipid A secondary hydroxy-acyltransferase and its role in innate immune recognition. *Mol Microbiol* 81(5):1313–1329.
4. Zhou Z, Lin S, Cotter RJ, Raetz CR (1999) Lipid A modifications characteristic of *Salmonella typhimurium* are induced by  $\text{NH}_4\text{VO}_3$  in *Escherichia coli* K12. Detection of 4-amino-4-deoxy-L-arabinose, phosphoethanolamine and palmitate. *J Biol Chem* 274(26):18503–18514.
5. Pride AC, Herrera CM, Guan Z, Giles DK, Trent MS (2013) The outer surface lipoprotein VolA mediates utilization of exogenous lipids by *Vibrio cholerae*. *MBio* 4(3):e00305–00313.
6. Needham BD, et al. (2013) Modulating the innate immune response by combinatorial engineering of endotoxin. *Proc Natl Acad Sci USA* 110(4):1464–1469.
7. Davies BW, Bogard RW, Mekalanos JJ (2011) Mapping the regulon of *Vibrio cholerae* ferric uptake regulator expands its known network of gene regulation. *Proc Natl Acad Sci USA* 108(30):12467–12472.
8. Livak KJ, Schmittgen TD (2001) Analysis of relative gene expression data using real-time quantitative PCR and the  $2^{-\Delta\Delta C(T)}$  Method. *Methods* 25(4):402–408.
9. Davies BW, Bogard RW, Young TS, Mekalanos JJ (2012) Coordinated regulation of accessory genetic elements produces cyclic di-nucleotides for *V. cholerae* virulence. *Cell* 149(2):358–370.
10. Cowles CE, Li Y, Semmelhack MF, Cristea IM, Silhavy TJ (2011) The free and bound forms of Lpp occupy distinct subcellular locations in *Escherichia coli*. *Mol Microbiol* 79(5):1168–1181.
11. Glauner B, Höltje JV, Schwarz U (1988) The composition of the murein of *Escherichia coli*. *J Biol Chem* 263(21):10088–10095.
12. Bachmann BJ (1972) Pedigrees of some mutant strains of *Escherichia coli* K-12. *Bacteriol Rev* 36(4):525Rev(1

13. Duthie ES, Lorenz LL (1952) Staphylococcal coagulase; mode of action and antigenicity. *J Gen Microbiol* 6(1-2):95–107.
14. Baumann P, Doudoroff M, Stanier RY (1968) A study of the Moraxella group. II. Oxidative-negative species (genus Acinetobacter). *J Bacteriol* 95(5):1520A stud
15. Bouvet PJM, Grimont PAD (1986) Taxonomy of the Genus Acinetobacter with the Recognition of Acinetobacter baumannii sp. nov., Acinetobacter haemolyticus sp. nov., Acinetobacter johnsonii sp. nov., and Acinetobacter junii sp. nov. and Emended Descriptions of Acinetobacter calcoaceticus and Acinetobacter lwoffii. *International Journal of Systematic and Evolutionary Microbiology* 36(2):228nal J
16. Jacobs AC, et al. (2014) AB5075, a Highly Virulent Isolate of Acinetobacter baumannii, as a Model Strain for the Evaluation of Pathogenesis and Antimicrobial Treatments. *mBio* 5(3):e01076et a
17. Fournier P-E, et al. (2006) Comparative genomics of multidrug resistance in Acinetobacter baumannii. *PLoS Genet* 2(1):e7.
18. Vallenet D, et al. (2008) Comparative analysis of Acinetobacters: three genomes for three lifestyles. *PLoS ONE* 3(3):e1805.
19. Iacono M, et al. (2008) Whole-genome pyrosequencing of an epidemic multidrug-resistant Acinetobacter baumannii strain belonging to the European clone II group. *Antimicrob Agents Chemother* 52(7):2616mother
20. Rozen S, Skaletsky H (1999) Primer3 on the WWW for General Users and for Biologist Programmers. *Bioinformatics Methods and Protocols*, Methods in Molecular Biology™., eds Misener S, Krawetz S (Humana Press), pp 36565man
21. Datsenko KA, Wanner BL (2000) One-step inactivation of chromosomal genes in Escherichia coli K-12 using PCR products. *Proc Natl Acad Sci USA* 97(12):6640A USAA
22. Ferrières L, et al. (2010) Silent Mischief: Bacteriophage Mu Insertions Contaminate Products of Escherichia coli Random Mutagenesis Performed Using Suicidal Transposon Delivery Plasmids Mobilized by Broad-Host-Range RP4 Conjugative Machinery. *J Bacteriol* 192(24):6418–6427.
23. Wang N, Ozer EA, Mandel MJ, Hauser AR (2014) Genome-Wide Identification of Acinetobacter baumannii Genes Necessary for Persistence in the Lung. *mBio* 5(3):e01163–14.

**Figure S1: Characterization of lipid A and phospholipid content in wild type and LOS-deficient *A. baumannii*.**

*baumannii*. (A) MALDI-TOF MS analysis of wild type (ATCC 19606 and ATCC 17978), LOS-deficient, and complemented *A. baumannii*. Major species are indicated at  $m/z$  1729.12 and  $m/z$  1911.29 (B)  $^{32}\text{P}$ -radiolabelled phospholipids were isolated from ATCC 19606, ATCC 17978, 5075, AYE parent *A. baumannii* strains and their LOS-deficient progeny and separated based on hydrophobicity using thin layer chromatography. Phosphatidylethanolamine (PE), phosphatidylglycerol (PG), cardiolipin (CL), and Lyso-phosphatidylethanolamine (Lyso-PE) are indicated.

**Figure S2: TLR-4/MD-2 activation of multidrug resistant *A. baumannii* strains.** Stimulation of human TLR-4/MD-2 following incubation of increasing concentrations ( $0$ ,  $10^2$ ,  $10^3$ ,  $10^4$ ,  $10^5$ ,  $10^6$ , CFU/ml) of bacterial cells with HEK blue cells expressing TLR-4, MD2, and CD14 is depicted. Detection of a secreted reporter indicates differential activation of TLR-4 in response to lipid A.

**Figure S3: Antibiotic resistance in wild type and LOS-deficient ATCC 19606 *A. baumannii*.** ATCC 19606 *A. baumannii* minimal inhibitory concentrations (MICs) to Polymyxin B, Ciprofloxacin, Tobramycin, and Tigecycline in wild type (top) and LOS-deficient (bottom) isolates.

**Fig S4: Analysis of wild type and LOS-deficient phospholipids.** (A) Normal phase MS of  $[\text{M-H}]^-$  ions of PG isolated from wild type or LOS-deficient *A. baumannii* (strain ATCC 17978 and 19606). MS/MS was performed on major peaks and the acyl chains associated with each peak are indicated in red. (B) Normal phase MS of  $[\text{M-H}]^-$  ions of CL isolated from wild type or LOS-deficient *A. baumannii* (strain ATCC 17978 or 19606).

**Fig S5: Analysis of wild type and LOS-deficient phospholipids.** (A) Normal phase MS of  $[\text{M-H}]^-$  ions of PE isolated from wild type or LOS-deficient *A. baumannii* (strain ATCC 17978 or 19606). MS/MS was performed on major peaks and the acyl chains associated with each peak are indicated in red. (B) Normal phase MS of  $[\text{M-H}]^-$  ions of Lyso-PE and PA from wild type or LOS-deficient *A. baumannii* (strain ATCC 17978 or 19606). MS/MS was performed on major Lyso-PE peaks and the acyl chain associated with each peak are indicated in red.

**Figure S6: Characterization of the ATCC 17978 *A. baumannii* transposon (Tn) mutants.** (A)  $^{32}\text{P}$ -radiolabelled lipid A was isolated from *E. coli*, parent *A. baumannii* strains, and the ATCC 17978 *ponA::Tn* mutants that have inactivated LOS biosynthesis. Lipid A was separated based on hydrophobicity using thin layer chromatography. (B) Wild type ATCC 17978 *A. baumannii* and the *ponA::Tn* LOS-deficient progeny

minimal inhibitory concentrations (MICs) to colistin (polymyxin E ) and vancomycin. (C) Stimulation of human TLR-4/MD-2 following incubation of increasing concentrations (0,  $10^2$ ,  $10^3$ ,  $10^4$ ,  $10^5$ ,  $10^6$ , CFU/ml) of bacterial cells with HEK blue cells expressing TLR-4, MD2, and CD14 is depicted. Detection of a secreted reporter indicates differential activation of TLR-4/MD-2 in response to lipid A.

**Figure S7: PBP1A is a penicillin binding protein with two highly conserved domains.** Sequence alignments of the glycosyltransferase and transpeptidase domains of *A. baumannii* and other relevant strains illustrate that PBP1A (encoded by *ponA*) is highly conserved among gammaproteobacteria. The conserved residues are highlighted (yellow). Inactivation of the glycosyltransferase catalytic domain in *A. baumannii* PBP1A was accomplished by replacing the Glutamic acid (E) at position 92 with glutamine (Q), while inactivation of the transpeptidase domain involved replacement of the serine (S) at position 459 with alanine (A). The mutated residues are highlighted (red) in strains ATCC 17978 and ATCC 19606 *A. baumannii*.

**Figure S8: A1S\_3196 and A1S\_3197 are one consecutive gene (*ponA*) that encodes PBP1A.** The published PBP1A (encoded by *ponA*) annotation of ATCC 19606 and 17978 beginning at tryptophan (W) 490. A guanine (highlighted) insertion in the ATCC 17978 annotation causes a frameshift resulting in Serine (S) 495 to Valine (V) followed by a stop codon. This predicted guanine insertion truncates the predicted *ponA* coding sequence into A1S\_3196 and A1S\_3197. However, Sanger sequencing indicates that the guanine insertion in ATCC 17978 is an artifact. A full length PBP1A protein is produced in *A. baumannii* ATCC 17978 as indicated in the immunoblot using PBP1A polyclonal antiserum.

**Figure S9: Characterization of ATCC 17978 *ponA* mutants.** (A) Minimal inhibitory concentrations (MICs) of wild type and  $\Delta ponA$  LOS-deficient ATCC 17978 *A. baumannii* to colistin (polymyxin E) and vancomycin. (B)  $^{32}\text{P}$ -radiolabelled lipid A was isolated from parent ATCC 17978 *A. baumannii*, the  $\Delta ponA$  mutant, and mutants complemented with either a native copy of PBP1A or with an inactivated glycosyltransferase domain (E92Q) or transpeptidase domain (S459A). Lipid A was separated based on hydrophobicity using thin layer chromatography. (C) Proteinase K treated whole-cell lysates were separated and stained with Pro-Q emerald 300 Lipopolysaccharide gel stain kit to visualize the LPS (*Salmonella*) or LOS (*E. coli* and *A. baumannii* strains).

**A**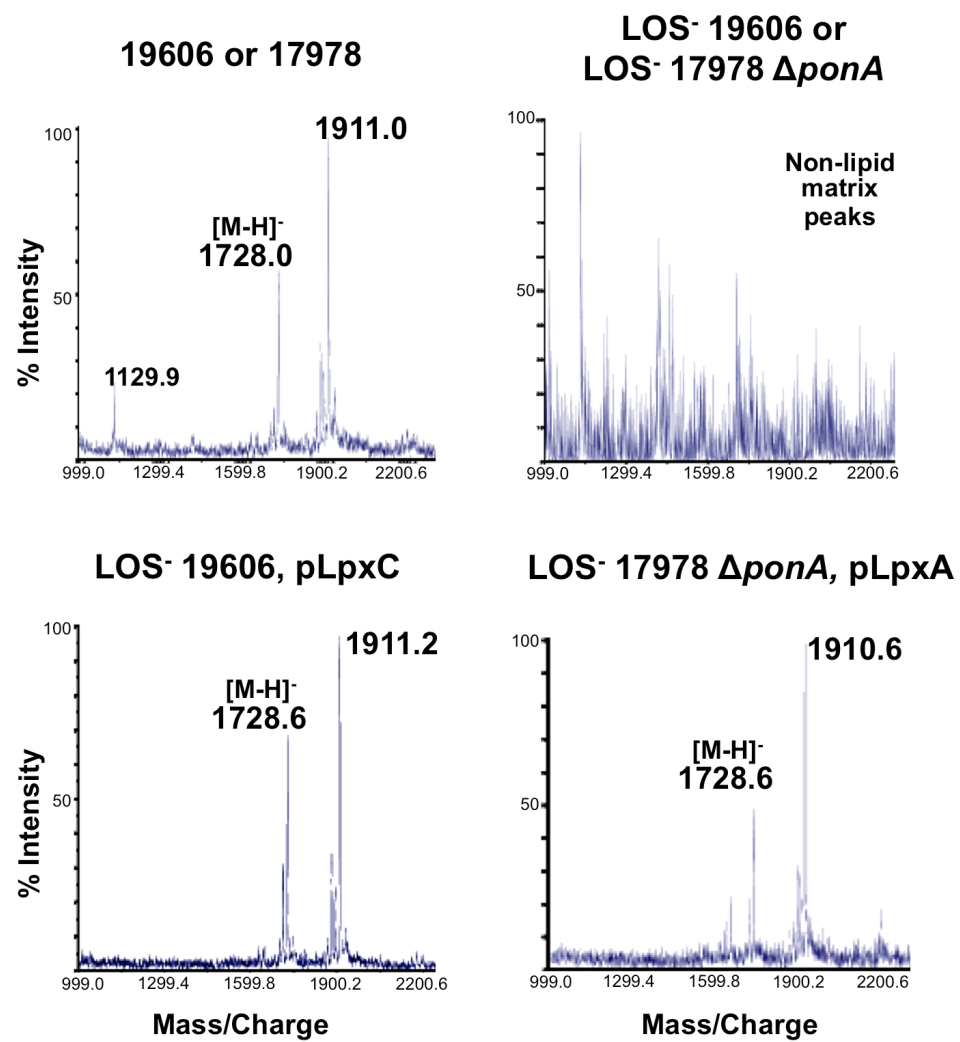**B**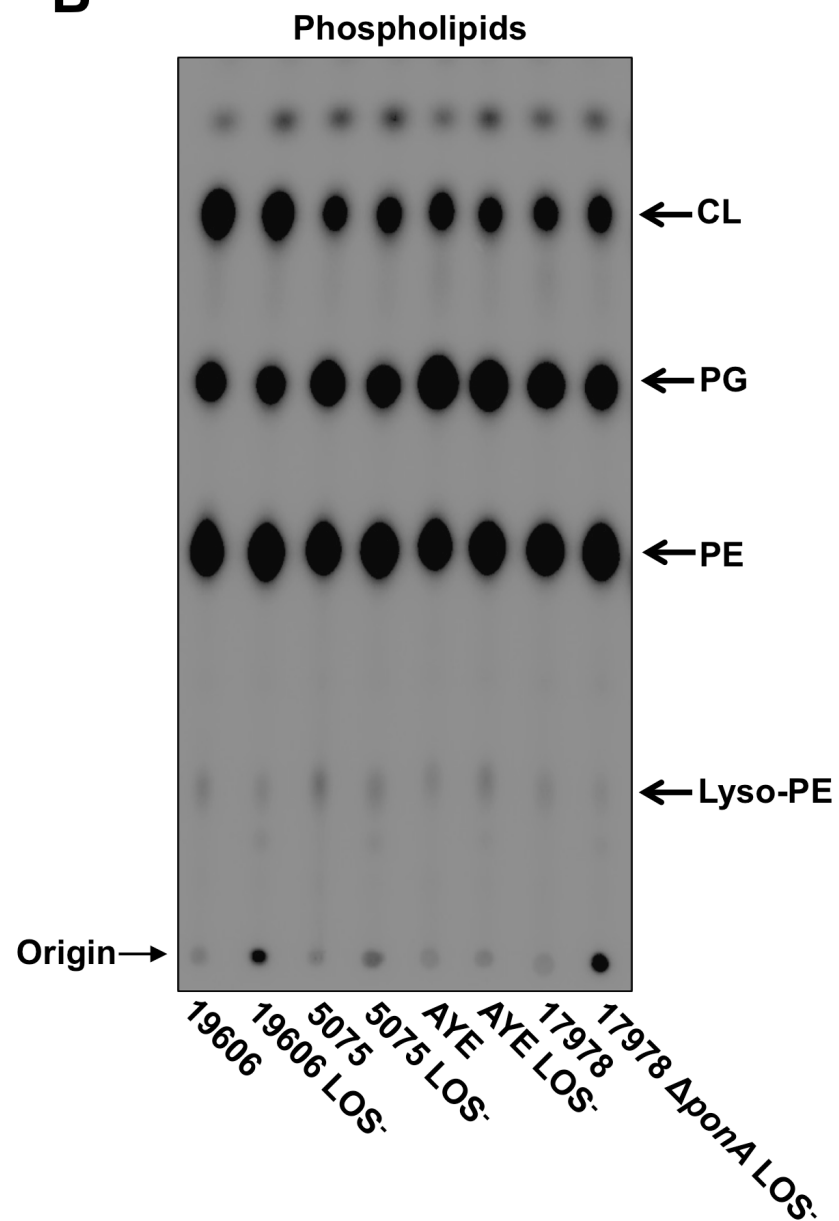

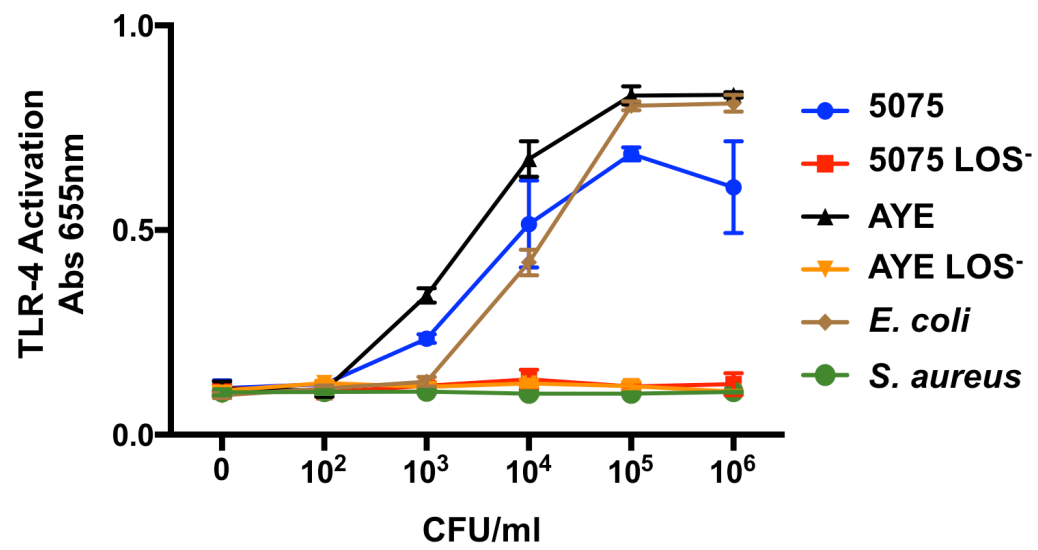

Polymyxin B   Ciprofloxacin   Tobramycin   Tigecycline

19606

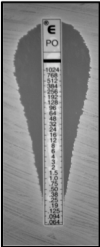

0.38

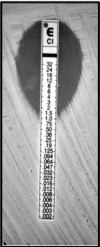

1.5

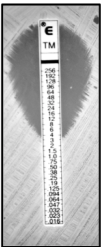

4.0

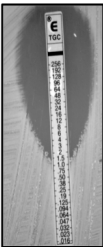

1.5

MIC (µg/ml)

19606  
LOS

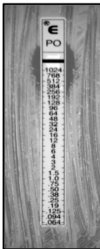

256

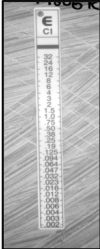

>32

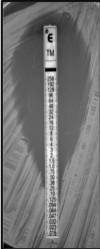

0.25

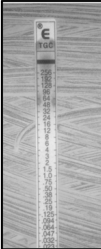

>256

MIC (µg/ml)

**A****PG [M-H]<sup>-</sup>**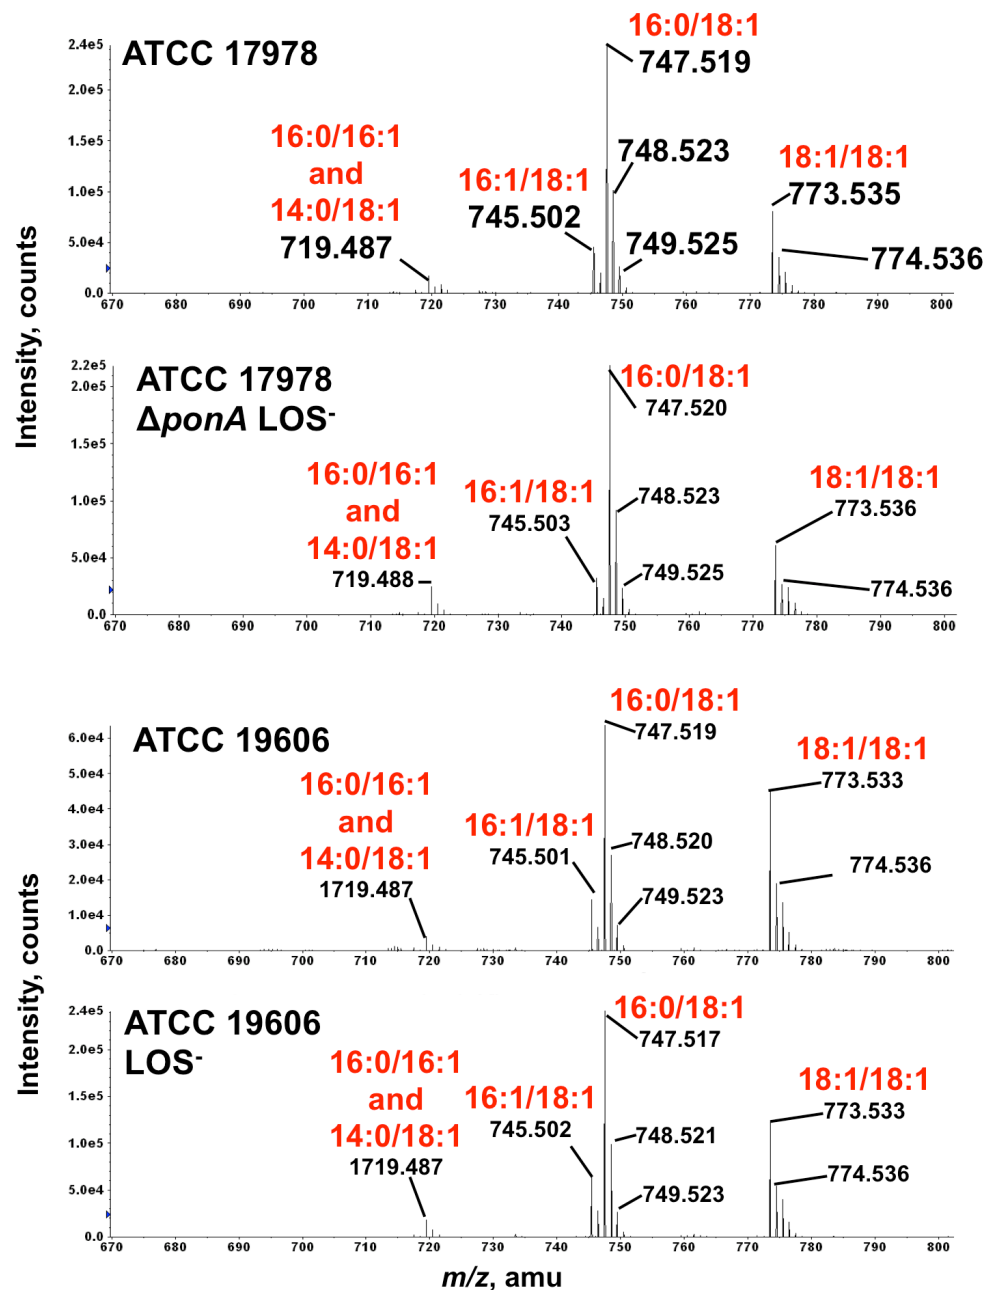**B****CL [M-H]<sup>-</sup>**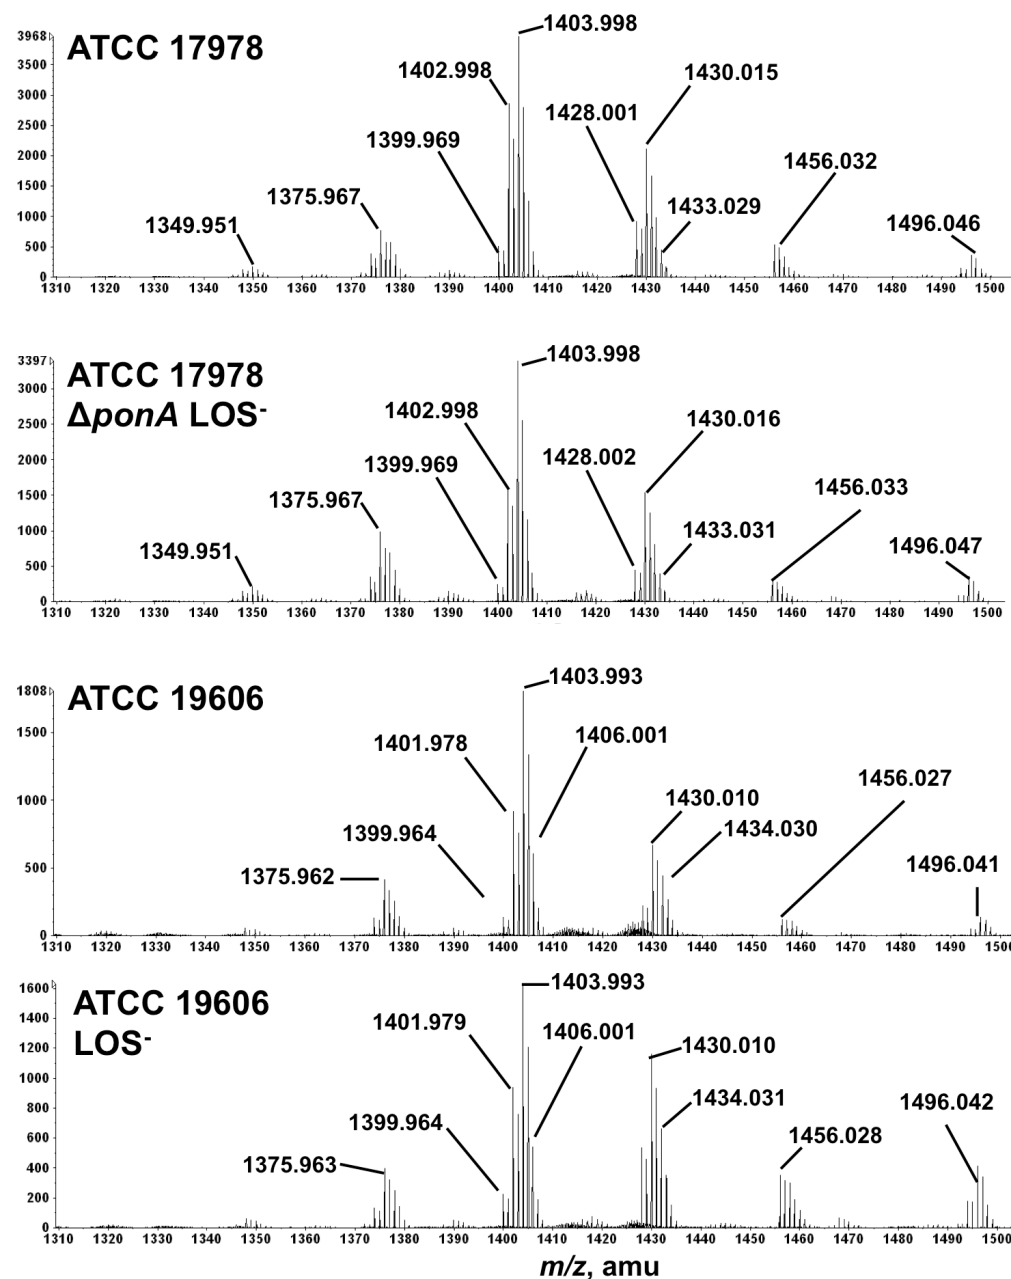

**A**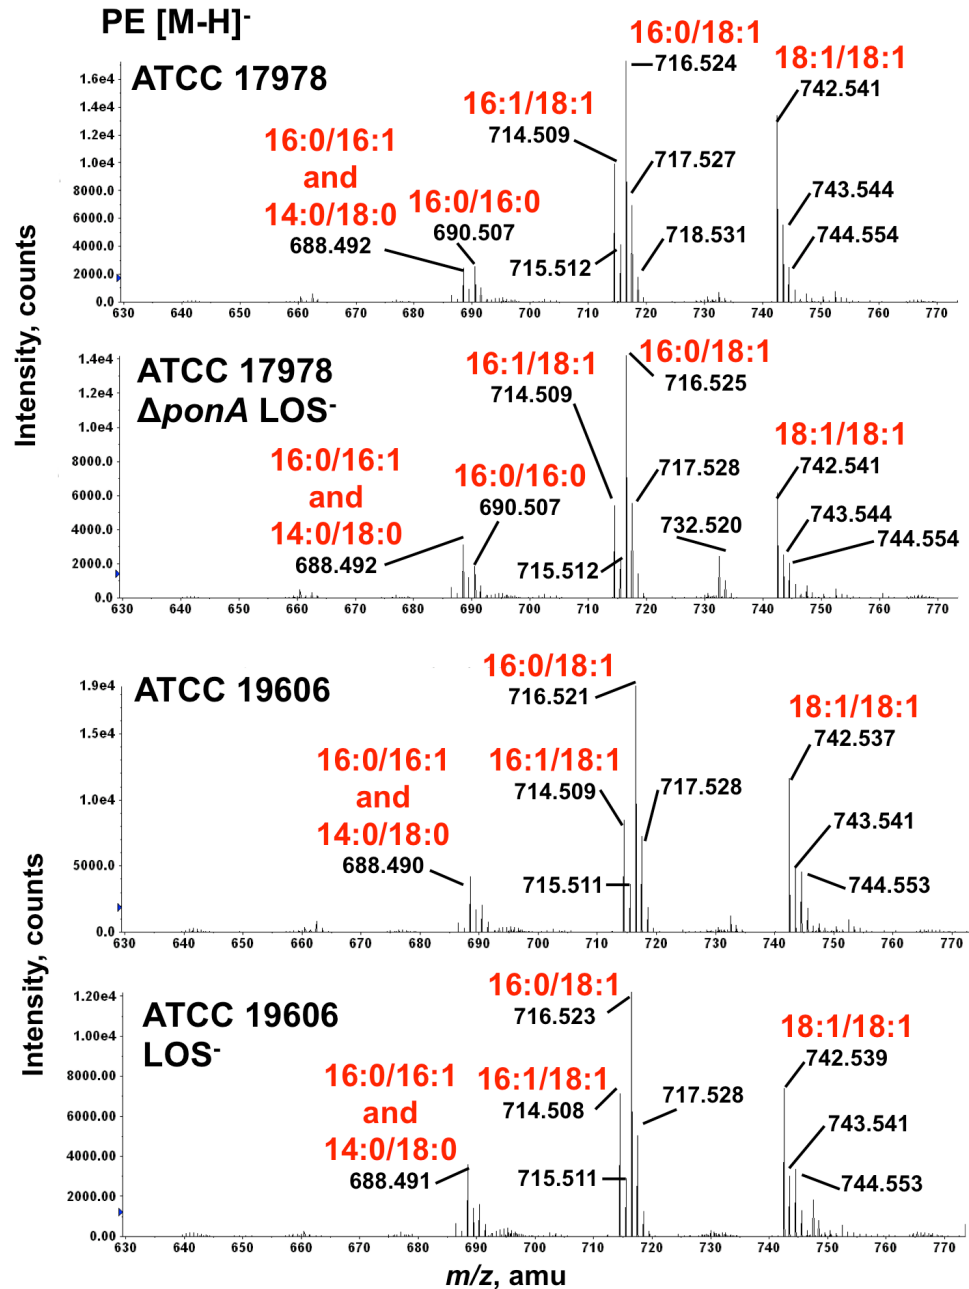**B**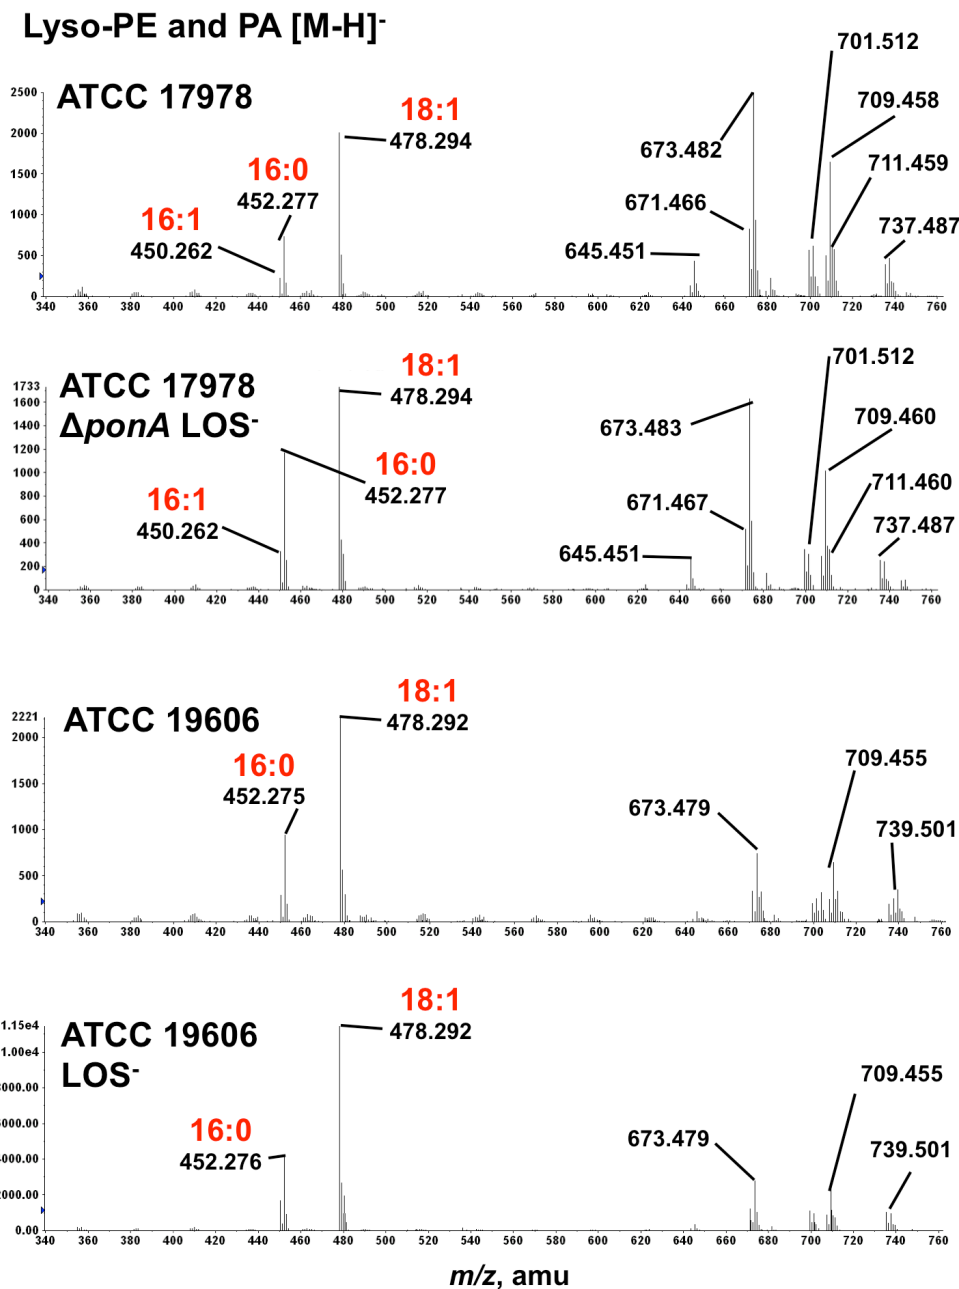

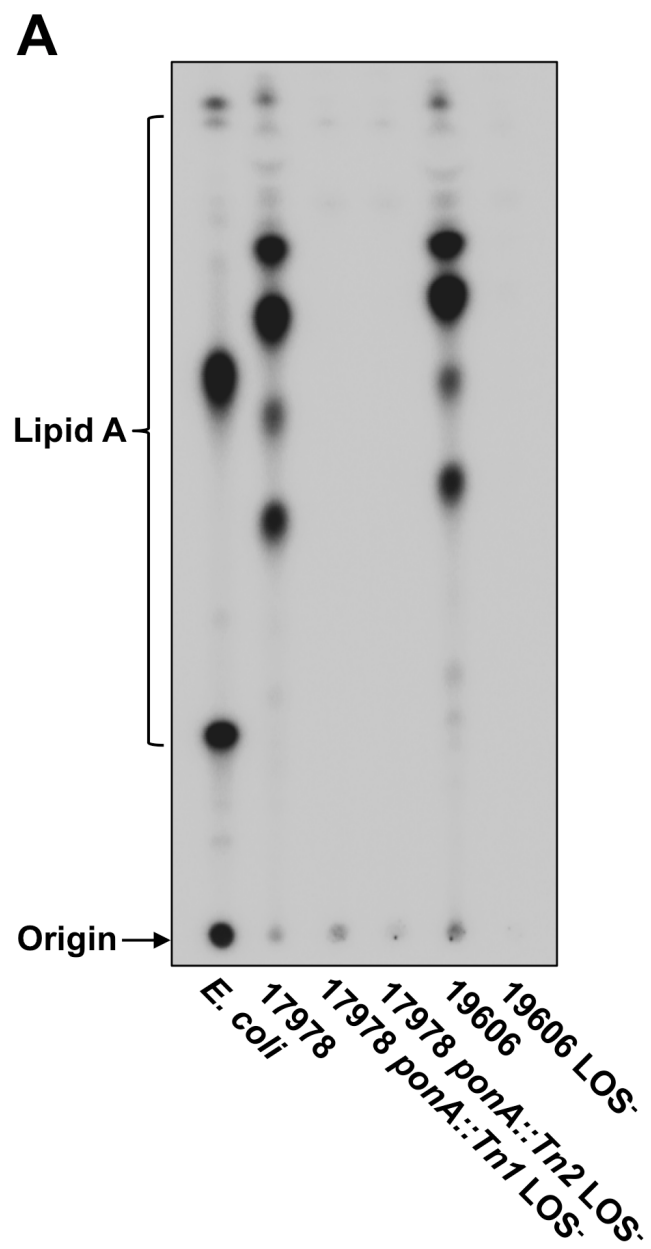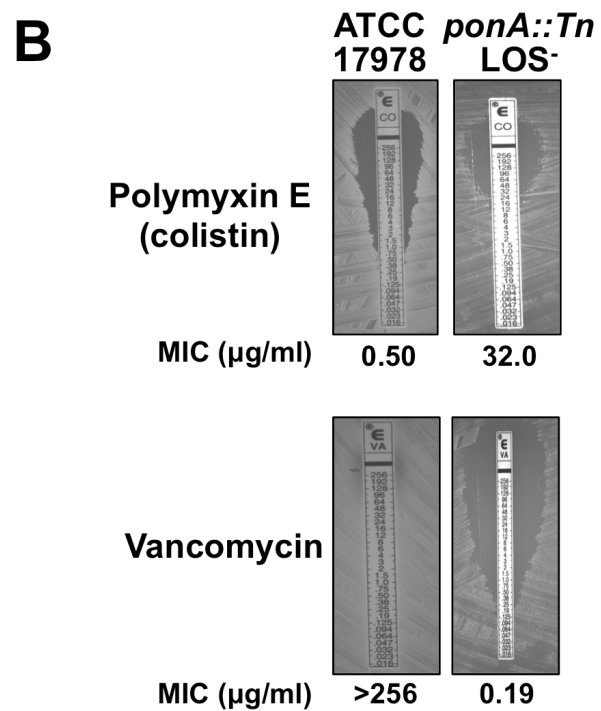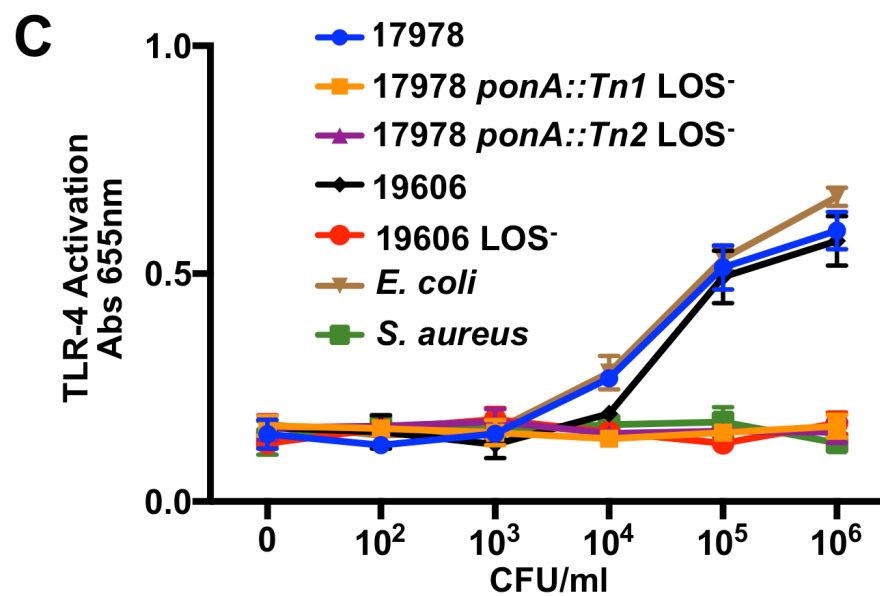

## PBP1A Domain alignments

### PBP1A Glycosyltransferase Domain

|                      |      |           |      |          |      |       |      |            |      |        |
|----------------------|------|-----------|------|----------|------|-------|------|------------|------|--------|
| <i>Ab</i> ATCC 17978 | -92  | EDSSFFEHS | -123 | GGSTITMQ | -145 | RKLTE | -162 | KEDILSLYVN | -227 | RRNWIL |
| <i>Ab</i> ATCC 19606 | -92  | EDSSFFEHS | -123 | GGSTITMQ | -145 | RKLTE | -162 | KEDILSLYVN | -227 | RRNWIL |
| <i>Ab</i> 5075       | -86  | EDSRFYEHG | -117 | GASTITQQ | -139 | RKIKE | -156 | KDEILELYLN | -221 | RRNVVL |
| <i>Ab</i> AYE        | -92  | EDSSFFEHS | -123 | GGSTITMQ | -145 | RKLTE | -162 | KEDILSLYVN | -227 | RRNWIL |
| <i>Nm</i> H44/76     | -88  | EDKRFYRHW | -119 | GASTITQQ | -141 | RKFNE | -158 | KDKILELYFN | -233 | RQKYIL |
| <i>Mc</i> O35E       | -100 | EDDTFFEHS | -131 | GGSTITMQ | -153 | RKLTE | -170 | KNEILTLYVN | -235 | RRNWII |
| <i>Ec</i> W3110      | -86  | EDSRFYEHG | -117 | GASTITQQ | -139 | RKIKE | -156 | KDEILELYLN | -221 | RRNVVL |
| <i>Vc</i> O395       | -96  | EDSRYYEHY | -127 | GASTITQQ | -149 | RKVKE | -166 | KQEILELYLN | -231 | RRNVVL |
| <i>Se</i> LT-2       | -94  | EDSRFYEHG | -125 | GASTITQQ | -147 | RKIKE | -164 | KNEILELYLN | -229 | RRNVVL |

### PBP1A Transpeptidase Domain

|                      |      |      |      |     |
|----------------------|------|------|------|-----|
| <i>Ab</i> ATCC 17978 | -459 | STIK | -512 | SRN |
| <i>Ab</i> ATCC 19606 | -459 | STIK | -512 | SRN |
| <i>Ab</i> 5075       | -465 | SNIK | -524 | SKN |
| <i>Ab</i> AYE        | -459 | STIK | -512 | SRN |
| <i>Nm</i> H44/76     | -461 | STFK | -521 | SKN |
| <i>Mc</i> O35E       | -468 | SIK  | -522 | SRN |
| <i>Ec</i> W3110      | -465 | SNIK | -524 | SKN |
| <i>Vc</i> O395       | -481 | SSIK | -540 | SKN |
| <i>Se</i> LT-2       | -473 | SNIK | -532 | SKN |

## Published Annotations

ATCC 19606- TGG ACA CCG AAG AAC TCT GAT GGT CGC TAC CTA GGC ATG ATC CCG TTA CGC  
W T P K N S D G R Y L G M I P L R

ATCC 17978- TGG ACA CCG AAG AAC **G**TC TGA TGG TCG CTA CCT AGG C ATG ATC CCG TTA CGC  
W T P K N V \* M I P L R

kDa

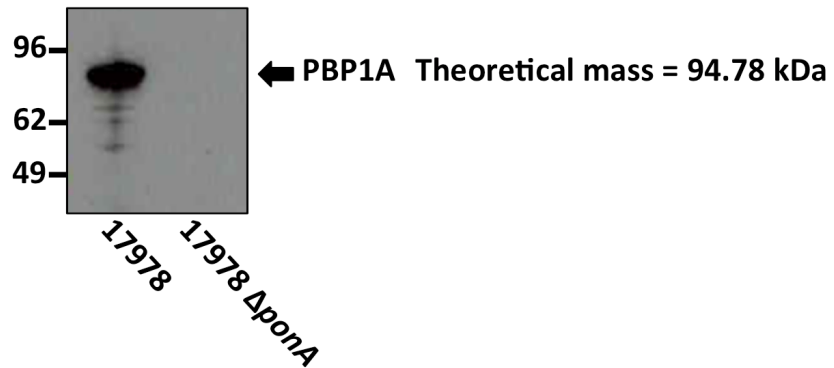

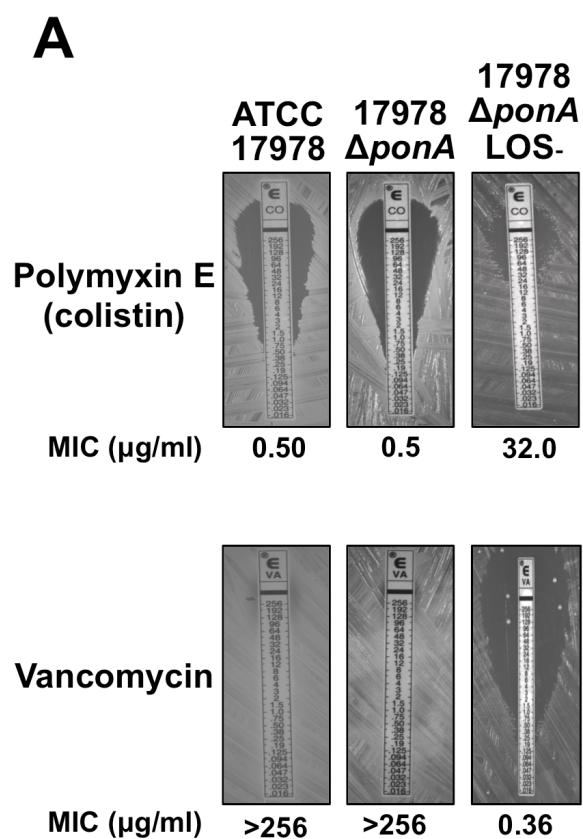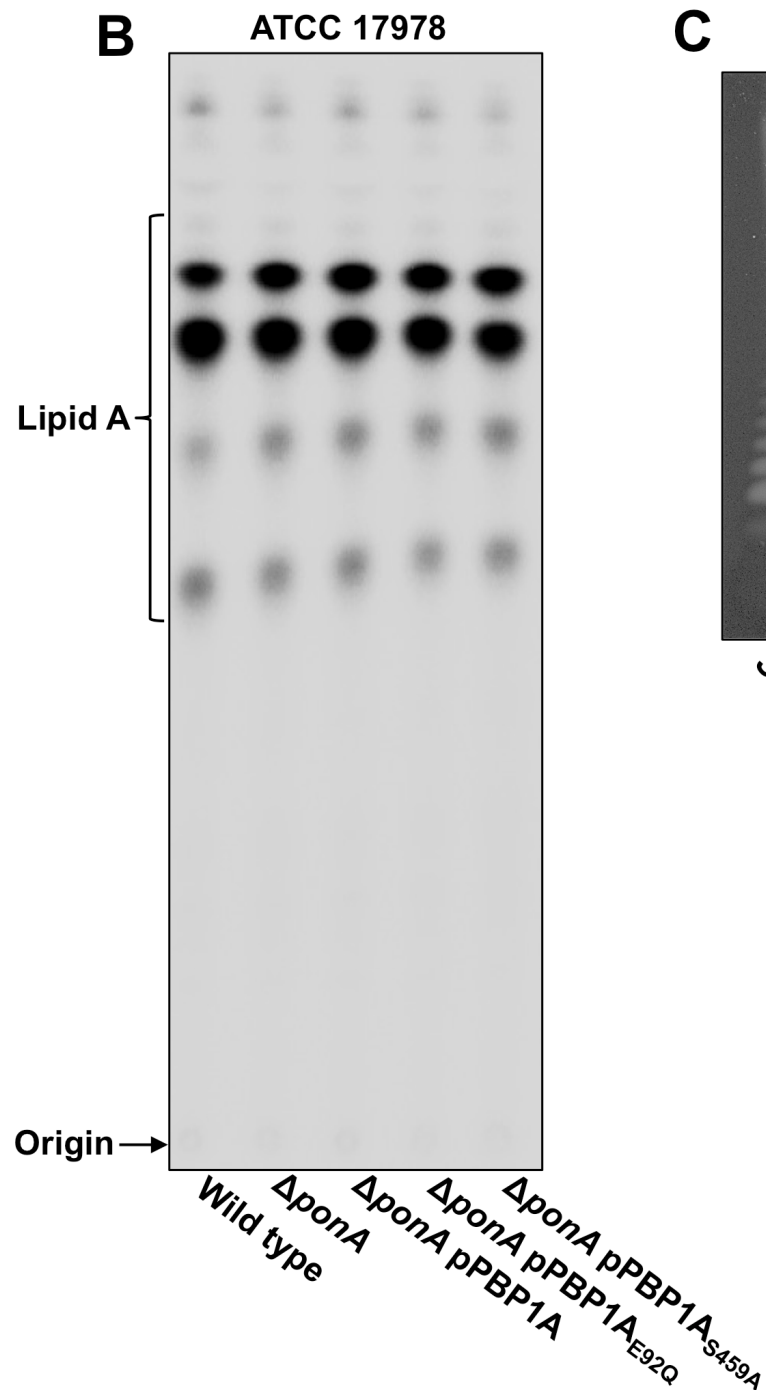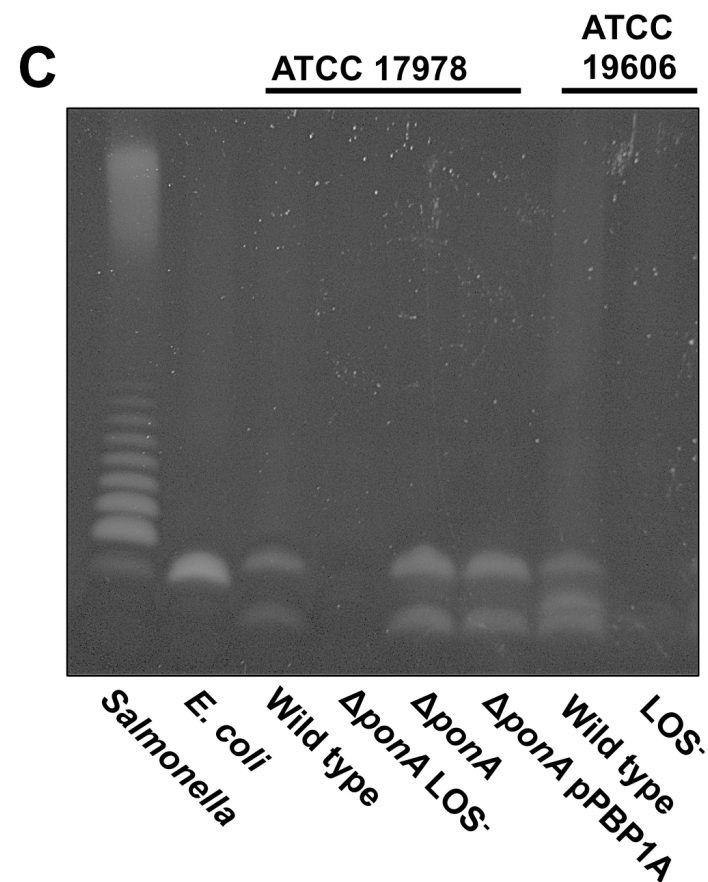

Table S1: Genomic Mutations in LOS-deficient *A. baumannii* strains

| Ab strain  | Lpx- gene mutation                       | Protein product | Mutation                  | Position         | Protein Mutation        | Confidence                                                                                                      | Count | Coverage | Frequency                                                                                                                                                                                          | Other mutations                                                                                      |
|------------|------------------------------------------|-----------------|---------------------------|------------------|-------------------------|-----------------------------------------------------------------------------------------------------------------|-------|----------|----------------------------------------------------------------------------------------------------------------------------------------------------------------------------------------------------|------------------------------------------------------------------------------------------------------|
| ATCC 17978 | <i>A1S_1965</i>                          | LpxA            | Insertion (- to C)        | 2277630          | V102 to Frameshift      | 0.99                                                                                                            | 850   | 874      | 97.25                                                                                                                                                                                              | None                                                                                                 |
| ATCC 19606 | <i>HMPREF0010_03502</i>                  | LpxC            | SNP <sup>a</sup> (C to T) | Contig1.9 138087 | Q58 to STOP             | 0.99                                                                                                            | 171   | 175      | 97.71                                                                                                                                                                                              | <i>HMPREF0010_00426</i> (Transcriptional Regulator) frameshift from deletion 7% into coding sequence |
| AYE        | <i>ABAYE0154</i>                         | LpxC            | Insertion                 | 168192           | Insertion to Frameshift | Insertion of ≈1.5 Kb fragment at base 395 of the <i>lpxC</i> coding sequence was confirmed by Sanger sequencing |       |          | 1. <i>ABAYE0386</i> ( <i>miaE</i> ) frameshift from deletion 10% into coding sequence.<br>2. <i>ABAYE3076</i> (TetR Transcriptional Regulator) SNP (T to G) at position 3111926 (N to K mutation). |                                                                                                      |
| 5075       | <i>ABUW_0152</i> ( <i>ABUW_RS00755</i> ) | LpxC            | SNP (C to T)              | 168546           | Q58 to STOP             | 0.99                                                                                                            | 77    | 79       | 97.47                                                                                                                                                                                              | None                                                                                                 |

<sup>a</sup>single nucleotide polymorphism

Table S2: Global Peptidoglycan Composition of *A. baumannii* strains

|                            |                           | Relative % of Each Muropeptide <sup>a</sup> |                        |                                           |           |                          |           |                                |           |                                                |           |
|----------------------------|---------------------------|---------------------------------------------|------------------------|-------------------------------------------|-----------|--------------------------|-----------|--------------------------------|-----------|------------------------------------------------|-----------|
| Peak number                | Name                      | ATCC 17978                                  |                        | ATCC 17978 $\Delta$ ponA LOS <sup>c</sup> |           | ATCC 17978 $\Delta$ ponA |           | ATCC 17978 $\Delta$ ponA pPonA |           | ATCC 17978 $\Delta$ ponA pPonA <sub>E92Q</sub> |           |
|                            |                           | mean of peaks                               | variation <sup>b</sup> | mean of peaks                             | variation | mean of peaks            | variation | mean of peaks                  | variation | mean of peaks                                  | variation |
| Peak 1                     | Tri                       | 2.36                                        | ± 0.48                 | 3.25                                      | ± 0.77    | 2.49                     | ± 0.73    | 3.09                           | ± 1.89    | 3.48                                           | ± 0.95    |
| Peak 2                     | TetraGly4                 | 2.54                                        | ± 0.38                 | 1.58                                      | ± 1.95    | 2.53                     | ± 0.16    | 2.77                           | ± 0.37    | 2.20                                           | ± 3.01    |
| Peak 3                     | Tetra                     | 19.81                                       | ± 0.97                 | 23.14                                     | ± 7.52    | 19.71                    | ± 1.11    | 19.13                          | ± 2.76    | 22.88                                          | ± 6.21    |
| Peak 4                     | TetraTri                  | 3.32                                        | ± 0.76                 | 4.47                                      | ± 3.21    | 3.98                     | ± 1.00    | 4.69                           | ± 3.15    | 4.39                                           | ± 1.41    |
| Peak 5                     | TetraTetra                | 37.89                                       | ± 1.19                 | 37.82                                     | ± 4.72    | 37.74                    | ± 0.71    | 36.78                          | ± 0.77    | 37.87                                          | ± 0.26    |
| Peak 6                     | TetraTetraTri             | 0.90                                        | ± 0.14                 | 1.29                                      | ± 0.28    | 1.03                     | ± 0.55    | 1.33                           | ± 0.39    | 1.38                                           | ± 0.32    |
| Peak 8                     | TetraTetraTetra           | 18.74                                       | ± 0.07                 | 12.45                                     | ± 0.14    | 16.86                    | ± 4.99    | 15.79                          | ± 7.87    | 12.22                                          | ± 0.96    |
| Peak 9                     | TetraTri(Anh) (~70%)      | 3.42                                        | ± 0.47                 | 1.20                                      | ± 0.14    | 2.84                     | ± 2.24    | 2.42                           | ± 2.67    | 1.18                                           | ± 0.38    |
| Peak 9                     | TetraTetraTetraTri (~30%) | 1.46                                        | ± 0.21                 | 0.52                                      | ± 0.06    | 1.22                     | ± 0.95    | 1.04                           | ± 1.15    | 0.51                                           | ± 0.16    |
| Peak 10                    | TetraTetraAnh I           | 1.17                                        | ± 0.15                 | 1.71                                      | ± 0.41    | 1.54                     | ± 0.71    | 1.06                           | ± 0.14    | 1.27                                           | ± 0.78    |
| Peak 11                    | TetraTetraAnhII           | 0.67                                        | ± 0.21                 | 1.67                                      | ± 0.64    | 0.91                     | ± 0.95    | 0.81                           | ± 0.04    | 1.29                                           | ± 0.33    |
| Peak 11B                   | TetraTetraTetraAnh        | 2.00                                        | ± 0.23                 | 1.92                                      | ± 1.76    | 2.30                     | ± 0.39    | 1.91                           | ± 0.35    | 2.06                                           | ± 0.97    |
| Sum of known peaks         |                           | 94.25                                       | ± 0.10                 | 91.21                                     | ± 4.42    | 93.00                    | ± 2.00    | 90.90                          | ± 3.80    | 90.64                                          | ± 0.73    |
| Monomers                   |                           | 26.21                                       | ± 0.14                 | 30.68                                     | ± 3.64    | 26.57                    | ± 2.43    | 27.59                          | ± 6.76    | 31.47                                          | ± 2.18    |
| Dimers                     |                           | 49.29                                       | ± 0.07                 | 51.51                                     | ± 0.67    | 50.49                    | ± 2.40    | 50.42                          | ± 2.14    | 50.71                                          | ± 1.50    |
| Trimers                    |                           | 22.95                                       | ± 0.00                 | 17.25                                     | ± 3.00    | 21.65                    | ± 3.83    | 20.86                          | ± 7.70    | 17.26                                          | ± 0.50    |
| Tetramers                  |                           | 1.56                                        | ± 0.21                 | 0.57                                      | ± 0.03    | 1.30                     | ± 1.00    | 1.13                           | ± 1.21    | 0.56                                           | ± 0.18    |
| % peptides in crosslinkage |                           | 73.79                                       | ± 0.14                 | 69.32                                     | ± 3.64    | 73.44                    | ± 2.43    | 72.41                          | ± 6.76    | 68.53                                          | ± 2.18    |
| Average chain length       |                           | 30.47                                       | ± 2.64                 | 34.30                                     | ± 4.70    | 29.40                    | ± 1.41    | 38.29                          | ± 18.70   | 39.92                                          | ± 10.83   |

|                            |                          | Relative % of Each Mucopeptide <sup>a</sup> |           |                             |           |               |           |                       |           |               |           |                      |           |
|----------------------------|--------------------------|---------------------------------------------|-----------|-----------------------------|-----------|---------------|-----------|-----------------------|-----------|---------------|-----------|----------------------|-----------|
|                            |                          | ATCC 19606                                  |           | ATCC 19606 LOS <sup>b</sup> |           | 5075          |           | 5075 LOS <sup>b</sup> |           | AYE           |           | AYE LOS <sup>b</sup> |           |
| Peak number                | Name                     | mean of peaks                               | variation | mean of peaks               | variation | mean of peaks | variation | mean of peaks         | variation | mean of peaks | variation | mean of peaks        | variation |
| Peak 1                     | Tri                      | 1.28                                        | ± 0.31    | 1.93                        | ± 0.79    | 1.75          | ± 0.30    | 1.48                  | ± 0.17    | 2.03          | ± 0.94    | 1.62                 | ± 0.21    |
| Peak 2                     | TetraGly4                | 1.49                                        | ± 0.60    | 1.47                        | ± 2.07    | 2.23          | ± 0.48    | 3.98                  | ± 4.61    | 2.86          | ± 0.98    | 0.79                 | ± 0.08    |
| Peak 3                     | Tetra                    | 19.42                                       | ± 0.10    | 22.73                       | ± 3.67    | 19.89         | ± 0.30    | 23.49                 | ± 4       | 19.77         | ± 2.27    | 25.58                | ± 4.70    |
| Peak 4                     | TetraTri                 | 1.94                                        | ± 0.53    | 3.01                        | ± 1.20    | 3.66          | ± 1.07    | 3.30                  | ± 2.24    | 4.06          | ± 0.91    | 2.63                 | ± 0.72    |
| Peak 5                     | TetraTetra               | 43.73                                       | ± 1.82    | 38.81                       | ± 0.23    | 40.43         | ± 1.94    | 37.19                 | ± 2.85    | 39.28         | ± 2.04    | 40.98                | ± 3.03    |
| Peak 6                     | TetraTetraTri            | 0.46                                        | ± 0.04    | 0.79                        | ± 0.28    | 1.00          | ± 0.31    | 1.05                  | ± 0.82    | 1.18          | ± 0.71    | 0.91                 | ± 0.66    |
| Peak 8                     | TetraTetraTetra          | 19.27                                       | ± 0.62    | 16.50                       | ± 4.03    | 17.60         | ± 0.30    | 14.70                 | ± 2.26    | 17.20         | ± 0.48    | 15.68                | ± 0.81    |
| Peak 9                     | TetraTri(Anh) (~70%)     | 2.95                                        | ± 0.21    | 2.63                        | ± 1.12    | 3.04          | ± 0.38    | 2.13                  | ± 0.44    | 2.77          | ± 0.28    | 2.31                 | ± 0.21    |
| Peak 9                     | TetraTetraTetraTri(~30%) | 1.26                                        | ± 0.09    | 1.13                        | ± 0.48    | 1.30          | ± 0.16    | 0.91                  | ± 0.19    | 1.19          | ± 0.12    | 0.99                 | ± 0.09    |
| Peak 10                    | TetraTetraAnh I          | 2.35                                        | ± 0.22    | 1.73                        | ± 1.21    | 0.96          | ± 0.35    | 0.93                  | ± 0.26    | 1.37          | ± 0.76    | 1.02                 | ± 0.16    |
| Peak 11                    | TetraTetraAnhII          | 0.88                                        | ± 0.16    | 1.10                        | ± 1.31    | 0.98          | ± 0.91    | 0.79                  | ± 0.27    | 0.81          | ± 0.04    | 1.04                 | ± 1.08    |
| Peak 11B                   | TetraTetraTetraAnh       | 3.17                                        | ± 0.32    | 1.65                        | ± 0.39    | 1.19          | ± 0.45    | 1.32                  | ± 0.85    | 1.67          | ± 1.33    | 0.77                 | ± 0.05    |
| Sum of known peaks         |                          | 98.16                                       | ± 0.31    | 93.45                       | ± 4.42    | 96.84         | ± 0.32    | 96.88                 | ± 4.76    | 96.36         | ± 3.28    | 94.31                | ± 4.09    |
| Monomers                   |                          | 22.60                                       | ± 1.09    | 27.98                       | ± 2.19    | 25.39         | ± 0.34    | 31.61                 | ± 7.51    | 26.19         | ± 0.43    | 29.64                | ± 3.39    |
| Dimers                     |                          | 52.80                                       | ± 0.89    | 50.61                       | ± 2.36    | 52.18         | ± 1.48    | 48.61                 | ± 1.91    | 51.28         | ± 0.09    | 50.89                | ± 0.95    |
| Trimers                    |                          | 23.33                                       | ± 0.29    | 20.22                       | ± 4.11    | 21.04         | ± 0.98    | 18.77                 | ± 5.53    | 21.28         | ± 0.51    | 18.43                | ± 2.31    |
| Tetramers                  |                          | 1.29                                        | ± 0.09    | 1.20                        | ± 0.46    | 1.39          | ± 0.17    | 1.00                  | ± 0.26    | 1.27          | ± 0.17    | 1.05                 | ± 0.14    |
| % peptides in crosslinkage |                          | 77.41                                       | ± 1.09    | 72.03                       | ± 2.19    | 74.61         | ± 0.34    | 68.39                 | ± 7.51    | 73.82         | ± 0.43    | 70.36                | ± 3.39    |
| Average chain length       |                          | 24.16                                       | ± 1.43    | 30.78                       | ± 5.35    | 34.74         | ± 0.71    | 42.48                 | ± 4.24    | 33.40         | ± 7.31    | 41.47                | ± 9.25    |

<sup>a</sup>Percentages calculated as per (Glauner *et al*).

<sup>b</sup>variation of two independent experiments

**Table S3: Strains and Plasmids used in this study**

| Strain or Plasmid                                | Genotype or Description                                                                | Reference                                                |
|--------------------------------------------------|----------------------------------------------------------------------------------------|----------------------------------------------------------|
| <b>Strain</b>                                    |                                                                                        |                                                          |
| <i>E. coli</i> W3110                             | Wild type, F- $\lambda$ - <i>rph-1</i> IN( <i>rrnD</i> , <i>rrnE</i> )1                | <i>E. coli</i><br>Genetic<br>Stock Center<br>(Yale) (12) |
| <i>E. coli</i> MFDpir                            | MG1655 <i>RP4-2-Tc::[ΔMu1::aac(3)IV-ΔaphA-Δnic35-ΔMu2::zeo] ΔdapA::(erm-pir) ΔrecA</i> | (22)                                                     |
| <i>Staphylococcus aureus</i> strain Newman       | Wild type                                                                              | ATCC (13)                                                |
| <i>A. baumannii</i> ATCC 17978                   | Wild type                                                                              | ATCC (14)                                                |
| <i>A. baumannii</i> ATCC 19606                   | Wild type                                                                              | ATCC (15)                                                |
| <i>A. baumannii</i> 5075                         | Wild type                                                                              | (16)                                                     |
| <i>A. baumannii</i> AYE                          | Wild type                                                                              | ATCC (17)                                                |
| <i>A. baumannii</i> SDF                          | Wild type                                                                              | ATCC (18)                                                |
| <i>A. baumannii</i> ACICU                        | Wild type                                                                              | (19)                                                     |
| <i>A. baumannii</i> Recent Clinical #1           | Wild type                                                                              | This study                                               |
| <i>A. baumannii</i> Recent Clinical #2           | Wild type                                                                              | This study                                               |
| <i>A. baumannii</i> Recent Clinical #3           | Wild type                                                                              | This study                                               |
| <i>A. baumannii</i> Recent Clinical #4           | Wild type                                                                              | This study                                               |
| <i>A. baumannii</i> Recent Clinical #5           | Wild type                                                                              | This study                                               |
| <i>A. baumannii</i> Recent Clinical #6           | Wild type                                                                              | This study                                               |
| <i>A. baumannii</i> Recent Clinical #7           | Wild type                                                                              | This study                                               |
| <i>A. baumannii</i> Recent Clinical #8           | Wild type                                                                              | This study                                               |
| <i>A. baumannii</i> Recent Clinical #9           | Wild type                                                                              | This study                                               |
| <i>A. baumannii</i> ATCC 17978, LOS <sup>-</sup> | Δ <i>ponA</i> , <i>lpxA</i> SNP                                                        | This study                                               |
| <i>A. baumannii</i> ATCC 19606, LOS <sup>-</sup> | <i>lpxC</i> SNP                                                                        | This study                                               |
| <i>A. baumannii</i> 5075, LOS <sup>-</sup>       | <i>lpxC</i> SNP                                                                        | This study                                               |
| <i>A. baumannii</i> AYE, LOS <sup>-</sup>        | <i>lpxC</i> insertion                                                                  | This study                                               |
| <i>A. baumannii</i> ATCC 17978                   | Δ <i>ponA</i>                                                                          | This study                                               |
| <i>A. baumannii</i> ATCC 17978                   | Δ <i>ponA</i> / p <i>PonA</i>                                                          | This study                                               |
| <i>A. baumannii</i> ATCC 17978                   | Δ <i>ponA</i> / p <i>PonA</i> <sub>E92Q</sub>                                          | This study                                               |
| <i>A. baumannii</i> ATCC 17978                   | Δ <i>ponA</i> / p <i>PonA</i> <sub>S459A</sub>                                         | This study                                               |
| <i>A. baumannii</i> ATCC 17978                   | Δ <i>ponB</i>                                                                          | This study                                               |
| <i>A. baumannii</i> ATCC 17978, LOS <sup>-</sup> | Δ <i>ponA</i> , <i>lpxA</i> SNP (LOS <sup>-</sup> ) / p <i>LpxA</i>                    | This study                                               |
| <i>A. baumannii</i> ATCC 19606, LOS <sup>-</sup> | <i>lpxC</i> SNP (LOS <sup>-</sup> ) / p <i>LpxC</i>                                    | This study                                               |
| <i>A. baumannii</i> ATCC 19606                   | HMPREF0010_01944- <i>His</i> <sub>6</sub>                                              | This study                                               |
| <i>A. baumannii</i> ATCC 19606, LOS <sup>-</sup> | HMPREF0010_01944- <i>His</i> <sub>6</sub>                                              | This study                                               |
| <i>A. baumannii</i> ATCC 19606                   | ΔHMPREF0010_01944- <i>His</i> <sub>6</sub>                                             | This study                                               |
| <i>A. baumannii</i> ATCC 19606, LOS <sup>-</sup> | ΔHMPREF0010_01944- <i>His</i> <sub>6</sub>                                             | This study                                               |
| <i>A. baumannii</i> ATCC 19606                   | p1944- <i>His</i> <sub>6</sub> -tag                                                    | This study                                               |
| <i>A. baumannii</i> ATCC 19606                   | HMPREF0010_01945- <i>His</i> <sub>6</sub>                                              | This study                                               |
| <i>A. baumannii</i> ATCC 19606, LOS <sup>-</sup> | HMPREF0010_01945-- <i>His</i> <sub>6</sub>                                             | This study                                               |
| <i>A. baumannii</i> ATCC 19606                   | ΔHMPREF0010_01945- <i>His</i> <sub>6</sub>                                             | This study                                               |
| <i>A. baumannii</i> ATCC 19606, LOS <sup>-</sup> | ΔHMPREF0010_01945- <i>His</i> <sub>6</sub>                                             | This study                                               |
| <i>A. baumannii</i> ATCC 19606                   | p1945- <i>His</i> <sub>6</sub> -tag                                                    | This study                                               |
| <i>A. baumannii</i> ATCC 19606                   | HMPREF0010_02739- <i>His</i> <sub>6</sub>                                              | This study                                               |
| <i>A. baumannii</i> ATCC 19606, LOS <sup>-</sup> | HMPREF0010_02739- <i>His</i> <sub>6</sub>                                              | This study                                               |
| <i>A. baumannii</i> ATCC 19606                   | ΔHMPREF0010_02739- <i>His</i> <sub>6</sub>                                             | This study                                               |
| <i>A. baumannii</i> ATCC 19606, LOS <sup>-</sup> | ΔHMPREF0010_02739- <i>His</i> <sub>6</sub>                                             | This study                                               |
| <i>A. baumannii</i> ATCC 19606                   | p2739- <i>His</i> <sub>6</sub> -tag                                                    | This study                                               |
| <b>Plasmid</b>                                   |                                                                                        |                                                          |
| pMMB67EH                                         | Amp <sup>R</sup>                                                                       | ATCC (20)                                                |
| pABBR                                            | Amp <sup>R</sup>                                                                       | (1)                                                      |
| pABBRKn                                          | pABBR_MCS with the <i>Kan</i> <sup>R</sup> gene from pKD4                              | This study                                               |

|                             |                                                                                                            |            |
|-----------------------------|------------------------------------------------------------------------------------------------------------|------------|
|                             | inserted into the PvuI site, Kan <sup>R</sup>                                                              |            |
| pMMB67EHKn                  | pMMB67EH with the <i>Kan<sup>R</sup></i> gene from pKD4 inserted into the PvuI site, Kan <sup>R</sup>      | This study |
| p1944-His <sub>6</sub> -tag | pMMB67EHKn with <i>HMPREF0010_01944</i> (ATCC 19606) cloned into the Sall and KpnI sites, Kan <sup>R</sup> | This study |
| p1945-His <sub>6</sub> -tag | pMMB67EHKn with <i>HMPREF0010_01945</i> (ATCC 19606) cloned into the Sall and KpnI, Kan <sup>R</sup>       | This study |
| p2739-His <sub>6</sub> -tag | pMMB67EHKn with <i>HMPREF0010_02739</i> (ATCC 19606) cloned into the Sall and KpnI, Kan <sup>R</sup>       | This study |
| pAT03                       | pMMB67EH with FLP recombinase, Amp <sup>R</sup>                                                            | (1)        |
| pAT04                       | pMMB67EH with REC <sub>Ab</sub> system, Tet <sup>R</sup>                                                   | (1)        |
| pKD4                        | Kan <sup>R</sup>                                                                                           | (21)       |
| pJNW684                     | Tn Vector, Am <sup>R</sup> , Kan <sup>R</sup>                                                              | (23)       |

**Table S4: Primers used in this study**

| <b>Primers</b>                                   |                                                                                                                                                                             |
|--------------------------------------------------|-----------------------------------------------------------------------------------------------------------------------------------------------------------------------------|
| <b>Deletion Primers</b>                          |                                                                                                                                                                             |
| <i>Ab 17978 ΔponA Kan-FRT Fwd</i>                | 5'-<br>actgaccacaattagtttgattcgatcttattaaagcttacttatcatgaaaaagc<br>tatccagtttgggcttcgtgcgtccaatTTTTgatcattattattatcttagtctcac<br>ttccgatgagcgattgtgtaggctggagctgcttcg -3'   |
| <i>Ab 17978 ΔponA Kan-FRT Rev</i>                | 5'-<br>gcatctccagaacgtcgtatgcaattagaacagaaagcacacttacaagtgacc<br>gcatcttttcaaatttatcttttcaaaagcgtaataaaaaagccatctaacgatgg<br>ctttttatttttaatatcctccttagttcctattccg-3'       |
| <i>Ab 17978 ΔponB Kan-FRT Fwd</i>                | 5'-<br>cataacaacaagatactgtaaaattcaatctaagtttccattattcacagttttat<br>cattgcaaattgatgacaagctatcgcatcattaacgcattgtttagggtttatct<br>catttatatgagcgattgtgtaggctggagctgcttcg -3'   |
| <i>Ab 17978 ΔponB Kan-FRT Rev</i>                | 5'-<br>agaaacaggaggtgttttctcttttggagctgaatgatctggtaaagttgtacagc<br>cgaccataagtacagcaccaatataaaaaacacctttcttaacatatcctgtttc<br>ctgttaacgcttaatatcctccttagttcctattccg -3'     |
| <i>Ab 19606 ΔHMPREF0010_02739 Kan-FRT Fwd</i>    | 5'-<br>ctcatttttactctatattttgattgtaaccaacaacgaaaagaaaaactctccat<br>tgtttctcatctttattatctaattctttaagtcattcttaaaacaaacattaaaggggt<br>ttaaccatgagcgattgtgtaggctggagctgcttcg-3' |
| <i>Ab 19606 ΔHMPREF0010_02739 Kan-FRT Rev</i>    | 5'-<br>gtaagtgccttgagtgtaaacacttttgatgaagtttagatgagacaaatagtc<br>aatcgtaaatagttatgtataacaaaaggcgcttctggcgctttgttttatta<br>ttttagaattaatatcctccttagttcctattccg-3'            |
| <i>Ab 19606 ΔHMPREF0010_01944-45 Kan-FRT Fwd</i> | 5'-<br>ggaaaaaataagccatttttacaaaaagtctattaaagcactcttaatttattactt<br>aatgggggaaaaccctccatgaaagcatactattctaggcgcaactgagtagag<br>gagtagctttaatgagcgattgtgtaggctggagctgcttcg-3' |
| <i>Ab 19606 ΔHMPREF0010_01944-45 Kan-FRT Rev</i> | 5'-<br>cgatgaatcaggtgtgagaattgctgaagtccaaaagacactttatatccgacgt<br>aaaaaagcaaaccttctactaataaaaataagcgctgaaggcgcttattttca<br>tttcaattttttaatatcctccttagttcctattccg-3'         |
| <b>Complementation Primers</b>                   |                                                                                                                                                                             |
| <i>Ab 17978 pPBP1A Native Promoter XhoI Fwd</i>  | 5'- cgcgCTCGAGtaacctgagcacactattgtcctattattttttatc -3'                                                                                                                      |
| <i>Ab 17978 pPBP1A Native Promoter KpnI Rev</i>  | 5'-cgcGGTACCcaagttattgatgctcctttagtacttgaccag-3'                                                                                                                            |

|                                                                   |                                                                                                                                                                                                        |
|-------------------------------------------------------------------|--------------------------------------------------------------------------------------------------------------------------------------------------------------------------------------------------------|
| <i>Ab</i> 17978 pLpxA Native Promoter XhoI Fwd                    | 5'-cgcgCTCGAGccaggttcattattcctgtttgctgg-3'                                                                                                                                                             |
| <i>Ab</i> 17978 pLpxA Native Promoter KpnI Rev                    | 5'-cgcGGTACCcaagtaaggcacctcgagcattgtac-3'                                                                                                                                                              |
| <i>Ab</i> 19606 pLpxC Native Promoter XhoI Fwd                    | 5'- cgcgCTCGAGtgagctgatgcagagccaag-3'                                                                                                                                                                  |
| <i>Ab</i> 19606 pLpxC Native Promoter KpnI Rev                    | 5'-cgcGGTACCgctctttaattattactggtgaaaatcaggcaatg-3'                                                                                                                                                     |
| <b>Mutagenesis Primers</b>                                        |                                                                                                                                                                                                        |
| <i>Ab</i> pPBP1A E92Q Fwd                                         | 5'-ttttattcatgcattcctggcagcaCAAgattcttctttcttgaacatagtg-3'                                                                                                                                             |
| <i>Ab</i> pPBP1A E92Q Rev                                         | 5'-<br>cactatgttcaaagaaagaagaatcTTGtgctgccaggaatgcatgaataaaa-3'                                                                                                                                        |
| <i>Ab</i> pPBP1A S459A Fwd                                        | 5'-<br>tttacaaggctggcgtcagccaggtGCTactatcaaaccattcctctatgctt-3'                                                                                                                                        |
| <i>Ab</i> pPBP1A S459A Rev                                        | 5'-<br>aagcatagaggaatggtttgatagtAGCacctggctgacgccagccttgtaaa-3'                                                                                                                                        |
| <b>6X-his tag Primers</b>                                         |                                                                                                                                                                                                        |
| <i>Ab</i> 19606<br><i>ΔHMPREF0010_02739</i><br>6X-his Kan-FRT Fwd | 5'-<br>ttggacaaactgtcaatgttcaagttggagataaaacacttgaaggtagcatgtaa<br>cctccgctttgagccaaaacgtcctcaaccaccagtcattgcacctgctccagta<br>gcatctcaagcaaaaacaccatcaccatcaccattaaagcgattgtgtaggctgga<br>gctgcttcg-3' |
| <i>Ab</i> 19606<br><i>ΔHMPREF0010_02739</i><br>6X-his Kan-FRT Rev | 5'-<br>gtaagtgcctttgagtgtaaacacttttgatgaagtttagatgagacaaatagta<br>aatcgtaaatagttatgtataaacaaggcgcttctggcgctttgttttatta<br>ttttagaaatcctccttagttcctattccg-3'                                            |
| <i>Ab</i> 19606<br><i>ΔHMPREF0010_01944</i><br>6X-his Kan-FRT Fwd | 5'-<br>ccaagagtgcgattggtgcaggtattggttcggtcggttgtaaagctatcataggt<br>ggtgatacaggtgctgcaattggtggcgcaatcggcgcggtgctggtgctgctg<br>attgaagaaaagaaacaccatcaccatcaccattaaagcgattgtgtaggctgg<br>agctgcttcg-3'   |
| <i>Ab</i> 19606<br><i>ΔHMPREF0010_01944</i><br>6X-his Kan-FRT Rev | 5'-<br>tttcgatgaatcaggtgtgagaattgctgaagtccaaaagacactttatatccgac<br>gtaaaaaagcaaaccttctactaataaaaataagcgctggaaggcgcttatttt<br>catttcacttatttatcctccttagttcctattccg-3'                                   |
| <i>Ab</i> 19606<br><i>ΔHMPREF0010_01945</i><br>6X-his Kan-FRT Fwd | 5'-<br>attggtgcaggtgttggggcaatcttaggtggtgcagtgattggtggtgacgctg<br>gtgctgctgcaggtggagcactcggtggtgtagtgctggtgcagcctatgaagaga<br>aaaaaggttaagtaaccatcaccatcaccattaa<br>agcgattgtgtaggctggagctgcttcg-3'    |

|                                                                   |                                                                                                                                                                       |
|-------------------------------------------------------------------|-----------------------------------------------------------------------------------------------------------------------------------------------------------------------|
| <i>Ab</i> 19606<br><i>ΔHMPREF0010_01945</i><br>6X-his Kan-FRT Rev | 5'-<br>taatagatattttgtaaagccaatttatgtgcagtgatgagttaaattacatctttt<br>aaaagcagataaaaaagaagctcttaatgaaataagagcttctttttaatatag<br>ttagaggtagttatatcctccttagttcctattccg-3' |
| <b>Overexpression Primers</b>                                     |                                                                                                                                                                       |
| <i>Ab</i> 19606<br>HMPREF0010_02739<br>6X-his KpnI Fwd            | 5'-cgcGGTACCatgaaaatgacggctaaaattgcattattcagt-3'                                                                                                                      |
| <i>Ab</i> 19606<br>HMPREF0010_02739<br>6X-his SalI Rev            | 5'-<br>cgcGTCGACcttagtgatggtgatggtgatgttttgcttgagatgctactggagc<br>ag-3'                                                                                               |
| <i>Ab</i> 19606<br>HMPREF0010_01944<br>6X-his KpnI Fwd            | 5'-<br>cgcGGTACCatgaataaaaaaattggtttaatatctactgtcatattatcaaca<br>g-3'                                                                                                 |
| <i>Ab</i> 19606<br>HMPREF0010_01944<br>6X-his SalI Rev            | 5'-<br>cgcGTCGACcttagtgatggtgatggtgatgtttcttttcttcaatcgcagcacca<br>gc-3'                                                                                              |
| <i>Ab</i> 19606<br>HMPREF0010_01945<br>6X-his KpnI Fwd            | 5'-cgcGGTACCatgaaaaaatgatgatgattgcaggtgttg-3'                                                                                                                         |
| <i>Ab</i> 19606<br>HMPREF0010_01945<br>6X-his SalI Rev            | 5'-<br>cgcGTCGACcttagtgatggtgatggtgatggtacttacctttttcttctcatagg<br>ctgcac-3'                                                                                          |
| <b>qPCR Primers</b>                                               |                                                                                                                                                                       |
| <i>ponA</i> Fwd                                                   | 5'-accgcttttaaaaccattgc-3'                                                                                                                                            |
| <i>ponA</i> Rev                                                   | 5'-tgccaggaatgcatgaataa-3'                                                                                                                                            |
| <i>lolA</i> Fwd                                                   | 5'-ctgccgattttgaacagaca-3'                                                                                                                                            |
| <i>lolA</i> Rev                                                   | 5'-ccggacgttcaactttcatt-3'                                                                                                                                            |
| 16S rDNA Fwd                                                      | 5'-gggagaaccagctatcacca-3'                                                                                                                                            |
| 16S rDNA Rev                                                      | 5'-gcaggttgaaggttgggtaa-3'                                                                                                                                            |
